# Supplementary material
Source: PubMed Central journal article supplement (PMC4186892)
Supplement: NIHMS598588-supplement-supplement_1.pdf [file NIHMS598588-supplement-supplement_1.pdf]

**Table E1. Candidate genes identified by WGS**

| Gene            | Full name                                            |
|-----------------|------------------------------------------------------|
| <i>BSDC1</i>    | BSD domain containing 1                              |
| <i>OSCP1</i>    | Organic solute carrier partner 1                     |
| <i>MPHOSPH8</i> | M-phase phosphoprotein 8                             |
| <i>CERK</i>     | Ceramide kinase                                      |
| <i>FAM203B</i>  | Family with sequence similarity 203, member B        |
| <i>C9orf57</i>  | Chromosome 9 open reading frame 57                   |
| <i>RAG1</i>     | Recombination activating gene                        |
| <i>EPPK1</i>    | Epiplakin 1                                          |
| <i>OR52A5</i>   | Olfactory receptor, family 52, subfamily A, member 5 |
| <i>ZNF284</i>   | Zinc finger protein 284                              |
| <i>SPAG8</i>    | Sperm associated antigen 8                           |
| <i>PHF2</i>     | PHD finger protein 2                                 |
| <i>LCAP</i>     | Lung carcinoma-associated protein 10                 |
